# Supplementary material
Source: HighWire-hosted journal article supplement (http://ajnr-stage2.highwire.org/highwire/filestream/94458/field_highwire_adjunct_files/0/0354.pdf)
Supplement: 0354.pdf [file 0354.pdf]

- 1 **Supplementary Table 1: Characteristics of patients with CSI captured during secondary interpretation.** Information regarding
- 2 the patients, injury, management, and complication is provided.

| Age | Sex    | Missed injury on primary interpretation                                                          | Outcome at discharge (alive vs deceased) | Injury pattern (stable vs unstable) | Management of injury                 | Did patient arrive in a cervical collar? | Complications pertaining to CSI | MRI performed following admission? |
|-----|--------|--------------------------------------------------------------------------------------------------|------------------------------------------|-------------------------------------|--------------------------------------|------------------------------------------|---------------------------------|------------------------------------|
| 57  | Female | Nondisplaced fracture C7 left transverse process                                                 | Alive                                    | Stable                              | Immobilization with cervical collar  | Unknown                                  | None                            | No                                 |
| 60  | Male   | Left occipital condyle fracture. C5 transverse process extending into the foramen transversarium | Alive                                    | Stable                              | Immobilization with cervical collar  | Unknown                                  | None                            | No                                 |
| 48  | Female | Right superior facet fracture of C7                                                              | Alive                                    | Stable                              | Immobilization with cervical collar  | Unknown                                  | None                            | No                                 |
| 26  | Male   | Fracture of the anterior and posterior wall of C4 left vertebral foramina                        | Alive                                    | Stable                              | Immobilization with cervical collar  | No                                       | None                            | Yes                                |
| 52  | Female | Nondisplaced fracture of the left transverse process of C7                                       | Alive                                    | Stable                              | Immobilization with cervical collar  | Yes                                      | None                            | Yes                                |
| 23  | Female | Acute anterior compression fracture of the C7 vertebral body                                     | Alive                                    | Stable                              | Immobilization with cervical collar  | Unknown                                  | None                            | Yes                                |
| 49  | Male   | Transverse fracture right lateral mass of C2                                                     | Alive                                    | Stable                              | Immobilization with cervical collar  | Unknown                                  | None                            | No                                 |
| 6   | Male   | Separation/fracture of the left synchondrosis of anterior arch of C1                             | Alive                                    | Stable                              | Immobilization with cervical collar  | Yes                                      | None                            | Yes                                |
| 81  | Female | C2 left facet fracture, nondisplaced C4 and C5 spinous                                           | Alive                                    | Unstable                            | Operative repair and cervical collar | Yes                                      | Central Cord Syndrome           | Yes                                |

|    |        |                                                                                                              |       |          |                                     |         |                       |     |
|----|--------|--------------------------------------------------------------------------------------------------------------|-------|----------|-------------------------------------|---------|-----------------------|-----|
|    |        | process fractures, C5 vertebral body fracture                                                                |       |          |                                     |         |                       |     |
| 18 | Female | Nondisplaced C2 fracture pedicle and left transverse foramen                                                 | Alive | Stable   | Immobilization with cervical collar | No      | None                  | No  |
| 84 | Male   | Anterior-inferior corner fracture of the C3 vertebral body<br><br>(teardrop fracture)                        | Alive | Unstable | Immobilization with cervical collar | Yes     | Central Cord Syndrome | Yes |
| 65 | Female | Acute minimally displaced fracture right lateral mass of C2 extending along the base of the odontoid process | Alive | Stable   | Immobilization with cervical collar | Yes     | None                  | Yes |
| 45 | Female | Avulsion fracture of the left occipital condyle                                                              | Alive | Stable   | Immobilization with cervical collar | Yes     | None                  | No  |
| 90 | Male   | Nondisplaced acute fracture of the<br><br>superior endplate of C7                                            | Alive | Stable   | Immobilization with cervical collar | Yes     | None                  | No  |
| 52 | Female | Comminuted fracture of spinous process of C4 vertebra                                                        | Alive | Stable   | Immobilization with cervical collar | Yes     | None                  | No  |
| 49 | Male   | Nondisplaced fracture of the left transverse process of C7, T1 and<br><br>T2                                 | Alive | Stable   | immobilization with cervical collar | Unknown | None                  | No  |
| 77 | Male   | Nondisplaced fracture of the anterior tubercle of C7 on the<br><br>left                                      | Alive | Stable   | Immobilization with cervical collar | Unknown | None                  | No  |

|    |      |                                                                   |          |        |                                        |         |      |     |
|----|------|-------------------------------------------------------------------|----------|--------|----------------------------------------|---------|------|-----|
| 75 | Male | Nondisplaced fracture of the C7<br>right inferior articular facet | Deceased | Stable | Immobilization with<br>cervical collar | Unknown | None | Yes |
|----|------|-------------------------------------------------------------------|----------|--------|----------------------------------------|---------|------|-----|

3

4
